## RESEARCH ARTICLE

## Adverse prognosis of glioblastoma contacting the subventricular zone: Biological correlates

Sharon Berendsen<sup>1</sup>, Emma van Bodegraven<sup>2</sup>, Tatjana Seute<sup>1</sup>, Wim G. M. Spliet<sup>3</sup>, Marjolein Geurts<sup>1</sup>, Jeroen Hendrikse<sup>4</sup>, Laurent Schoysman<sup>5,6</sup>, Willemijn B. Huiszoon<sup>1</sup>, Meri Varkila<sup>1</sup>, Soufyan Rouss<sup>1</sup>, Erica H. Bell<sup>7</sup>, Jérôme Kroonen<sup>1,5</sup>, Arnab Chakravarti<sup>7</sup>, Vincent Bours<sup>5</sup>, Tom J. Snijders<sup>1</sup>, Pierre A. Robe<sup>1,5,7\*</sup>

**1** UMC Utrecht Brain Center, Department of Neurology and Neurosurgery, University Medical Center of Utrecht, Utrecht, The Netherlands, **2** UMC Utrecht Brain Center, Department of Translational Neuroscience, University Medical Center of Utrecht, Utrecht, The Netherlands, **3** Department of Pathology, University Medical Center of Utrecht, Utrecht, The Netherlands, **4** Department of Radiology, University Medical Center of Utrecht, Utrecht, The Netherlands, **5** Department of Human Genetics, GIGA Research Center, Liège University Hospital, Liège, Belgium, **6** Department of Radiology, Liège University Hospital, Liège, Belgium, **7** Department of Radiation Oncology, Wexner Medical Center, James Cancer Center, Ohio State University, Columbus, OH, United States of America

\* [p.robe@umcutrecht.nl](mailto:p.robe@umcutrecht.nl)

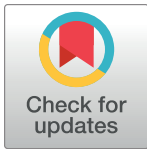

## OPEN ACCESS

**Citation:** Berendsen S, van Bodegraven E, Seute T, Spliet WGM, Geurts M, Hendrikse J, et al. (2019) Adverse prognosis of glioblastoma contacting the subventricular zone: Biological correlates. PLoS ONE 14(10): e0222717. <https://doi.org/10.1371/journal.pone.0222717>

**Editor:** Joseph Najbauer, University of Pécs Medical School, HUNGARY

**Received:** May 5, 2019

**Accepted:** September 5, 2019

**Published:** October 11, 2019

**Copyright:** © 2019 Berendsen et al. This is an open access article distributed under the terms of the [Creative Commons Attribution License](https://creativecommons.org/licenses/by/4.0/), which permits unrestricted use, distribution, and reproduction in any medium, provided the original author and source are credited.

**Data Availability Statement:** Clinical dataset is appended to the paper (S1 Appendix). Microarray data are publicly available on the Gene Expression Omnibus (GEO) website with accession number GSE134783.

**Funding:** This work was supported by the following grants: PNC-029-006 of the Belgian Ministry of Health, grants FRSM 3.4.562.12, Televie 1.5.162.10 of the FNRS of Belgium, FBC 2010.14 of the Belgian Foundation against Cancer, and an unrestricted grant of the T&P Bohnenn fund for

## Abstract

## Introduction

The subventricular zone (SVZ) in the brain is associated with gliomagenesis and resistance to treatment in glioblastoma. In this study, we investigate the prognostic role and biological characteristics of subventricular zone (SVZ) involvement in glioblastoma.

## Methods

We analyzed T1-weighted, gadolinium-enhanced MR images of a retrospective cohort of 647 primary glioblastoma patients diagnosed between 2005–2013, and performed a multi-variable Cox regression analysis to adjust the prognostic effect of SVZ involvement for clinical patient- and tumor-related factors. Protein expression patterns of a.o. markers of neural stem cellness (CD133 and GFAP- $\delta$ ) and (epithelial-) mesenchymal transition (NF- $\kappa$ B, C/EBP- $\beta$  and STAT3) were determined with immunohistochemistry on tissue microarrays containing 220 of the tumors. Molecular classification and mRNA expression-based gene set enrichment analyses, miRNA expression and SNP copy number analyses were performed on fresh frozen tissue obtained from 76 tumors. Confirmatory analyses were performed on glioblastoma TCGA/TCIA data.

## Results

Involvement of the SVZ was a significant adverse prognostic factor in glioblastoma, independent of age, KPS, surgery type and postoperative treatment. Tumor volume and postoperative complications did not explain this prognostic effect. SVZ contact was associated with increased nuclear expression of the (epithelial-) mesenchymal transition markers C/EBP- $\beta$  and phospho-STAT3. SVZ contact was not associated with molecular subtype,

Neuro-Oncological Research to TS and PR. In addition, this work was supported by National Cancer Institute R01CA169368, R01CA108633, R01CA188228, R01CA188500, 1RC2CA148190 and The Ohio State University Comprehensive Cancer Center Award (all to A.C.). We also thank The Ohio State University (OSU) Comprehensive Cancer Center Genomics Shared Resource supported in part by grant P30 CA016058, National Cancer Institute, Bethesda, MD. The funders had no role in study design, data collection and analysis, decision to publish, or preparation of the manuscript.

**Competing interests:** The authors have declared that no competing interests exist.

distinct gene expression patterns, or markers of stem cellness. Our main findings were confirmed in a cohort of 229 TCGA/TCIA glioblastomas.

## Conclusion

In conclusion, involvement of the SVZ is an independent prognostic factor in glioblastoma, and associates with increased expression of key markers of (epithelial-) mesenchymal transformation, but does not correlate with stem cellness, molecular subtype, or specific (mi)RNA expression patterns.

## Introduction

Glioblastoma is the most malignant primary brain tumor, with a median prognosis of 15–20 months despite intensive treatment [1]. In many patients, glioblastoma cells invade the subventricular zone (SVZ) [2, 3]. This area represents a neurogenic zone in the adult brain and contains neural stem cells [4], which are suggested to play a role in gliomagenesis [4–6]. It is also a protective niche attracting tumor-initiating cells and allowing them to escape treatment [4, 7–11] and could thus favor tumor progression [12–14]. Furthermore, a more invasive and multifocal phenotype of tumors contacting the SVZ on MRI was reported [15].

Based on univariable statistics [14, 16, 17] or small to mid-size patient series [17, 18], the radiological involvement of the SVZ seems to associate with an adverse prognosis. Radiogenomics [19–23] and proteomics [24] studies have proposed potential associations between MRI characteristics and gene/protein expression profiles in glioblastoma. These studies have variably associated SVZ-contacting tumors with differential expression of several genes and gene expression signatures, involving glioma stem cell signaling, hypoxia, tumor vascularity, and invasion [19–26]. Simple radiological features might thus be informative of the tumor's biological characteristics.

In this paper, we aim to validate the prognostic role of glioblastoma involvement of the SVZ in a large, well-characterized cohort of 647 patients. Additionally, we analyze clinical and tumor biological factors that associate with this prognostic effect, to help further understand this relation.

## Materials and methods

### Ethics statement

This study was conducted following approval by the local ethical committee (METC Utrecht) and institutional review board (Biobank Research Ethics Committee Utrecht, protocols 16–229, 16–342, 16–348). Fresh-frozen samples were obtained following written informed consent. According to Dutch regulations, the need for informed consent was waived for the rest of this retrospective analysis.

### Patient cohorts

A flowchart describing the cohorts in this study is included in Fig 1.

All adult patients ( $n = 647$ ) with histologically confirmed *de novo* supratentorial glioblastoma (WHO grade IV) diagnosed at the University Medical Center of Utrecht (UMCU) between 2005–2013 were retrospectively included. Details on this cohort are provided in Table 1, S1 Appendix and were published before [27]. Age, gender, Karnofsky performance

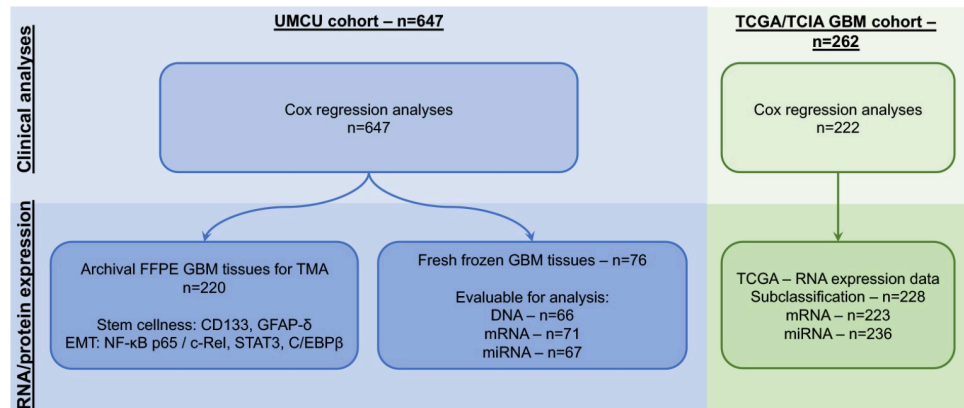

**Fig 1. Overview of study cohorts.** Abbreviations: UMCU: University Medical Center Utrecht; FFPE: Formalin fixed paraffin embedded; GBM: glioblastoma; EMT: epithelial-mesenchymal transition; TCGA: The Cancer Genome Atlas; TCIA: The Cancer Imaging Archive.

<https://doi.org/10.1371/journal.pone.0222717.g001>

status (KPS), tumor volume, surgery type and postoperative treatment were recorded. Complications within 30 days from surgery were recorded according to the Common Terminology Criteria for Adverse Events (CTCAE). Survival data (days from surgery) were retrieved from hospital records and community archives. IDH1 mutational status was not yet routinely

**Table 1. Baseline table.**

| Patient characteristics                    | SVZ contact         | No SVZ contact     | Statistical analysis                |
|--------------------------------------------|---------------------|--------------------|-------------------------------------|
| <i>n</i> (%)                               | 371 (57.3)          | 240 (37.1)         |                                     |
| Age (mean ± SD)                            | 62.0 ± 12.1         | 60.6 ± 12.7        | Independent t-test, <i>P</i> = 0.16 |
| Gender (% male)                            | 60.6                | 60.0               | $\chi^2$ test, <i>N.S.</i>          |
| KPS <i>n</i> (%) < 70                      | 112 (30.2)          | 50 (20.8)          | $\chi^2$ test, <i>P</i> = 0.01      |
| ≥ 70                                       | 256 (69.0)          | 189 (78.8)         |                                     |
|                                            | Missing: 3 (0.8)    | Missing: 1 (0.4)   |                                     |
| Tumor volume <i>cm</i> <sup>3</sup>        | 46.8 (27.8–73.1)    | 16.8 (6.9–32.8)    | Mann Whitney U test,                |
| (median (IQR))                             | Missing: 6 (1.6)    | Missing: 3 (1.3)   | <i>P</i> < 0.0005                   |
| Extent of surgery <i>n</i> (%)             |                     |                    | Fisher exact test,                  |
| Biopsy                                     | 154 (41.5)          | 55 (22.9)          | <i>P</i> < 0.0005                   |
| Debulking                                  | 217 (58.5)          | 185 (77.1)         |                                     |
| Post-surgical treatment <i>n</i> (%)       |                     |                    | Fisher exact test,                  |
| None                                       | 97 (26.1)           | 34 (14.2)          | <i>P</i> < 0.0005                   |
| Monotherapy                                | 101 (27.2)          | 52 (21.7)          |                                     |
| RT + TMZ                                   | 171 (46.1)          | 152 (63.3)         |                                     |
|                                            | Missing: 2 (0.5)    | Missing: 2 (0.8)   |                                     |
| CTCAE complications grade 3–5 <i>n</i> (%) | 62 (16.7)           | 25 (10.4)          | $\chi^2$ test, <i>P</i> = 0.032     |
| IDH1 mutational status <i>n</i> (%)        |                     |                    | $\chi^2$ test, <i>P</i> = 0.21      |
| R132H mutation                             | 9 (2.4)             | 12 (5.0)           |                                     |
| Wild-type                                  | 183 (49.3)          | 139 (57.9)         |                                     |
|                                            | Missing: 179 (48.2) | Missing: 89 (37.1) |                                     |

Missing SVZ status: 36 (5.6%). Abbreviations: KPS: Karnofsky performance score; SVZ: subventricular zone; IQR: interquartile range; RT: radiotherapy; TMZ: temozolomide

<https://doi.org/10.1371/journal.pone.0222717.t001>

determined in clinical practice at our center, and was available for 343/647 patients from a previous study [27]. SVZ contact was defined as direct contact of the T1-weighted, gadolinium-enhancing part of the tumor with the lateral ventricles, and as detailed in the supplementary methods (S2 Appendix). Tumor volume was measured as the volume of the contrast-enhancing lesion on the presurgical MRI scan with OsiriX software version 4.1.2 (Pixmeo, Bernex, Switzerland).

From these patients, 76 fresh-frozen surgical samples of *de novo* glioblastomas were prospectively collected between 2010 and 2015 for DNA, mRNA and miRNA analyses. SVZ status was unavailable for 5 of these patients.

In addition, we retrospectively collected archival tumor tissues for the consecutive 229 glioblastoma patients treated in the UMCU between 2005 and 2008. Tissue was available for inclusion in tissue microarrays (TMAs) for 220/229 patients. SVZ status was unavailable for 14 of these patients.

### mRNA and miRNA expression analysis

Processing of the fresh-frozen surgical samples-derived mRNA and miRNA samples and data was described previously [28]. Analyses are described in more detail in the supplementary methods (S2 Appendix). Microarray data are made publically available on the GEO platform (accession number GSE134783).

After omitting samples with missing MRI data or insufficient RNA quality, 71 RNA samples and 67 miRNA samples were evaluable for analysis. Gene expression analyses were performed using the Partek suite built-in ANOVA pipeline, with an FDR<0.05 threshold for significance. Exploratory Gene Set Enrichment Analyses (GSEA) were performed with use of the Broad Institute MySig libraries of curated gene sets C1 –C7 version 5.0 [29]. An exploratory false discovery rate (FDR) threshold of 0.25 was applied as recommended [30]. Molecular subclassification (proneural, neural, classical, mesenchymal) was predicted by hierarchical clustering, as described previously [28, 31]. Classes could be unequivocally assigned to 62 samples.

For the miRNA analyses, RNA was isolated with the MiRNeasy Micro Kit (Qiagen, Venlo, The Netherlands). Expression profiling of 800 miRNA probes was performed with the nCounter Human v2 miRNA Expression Assay (NanoString Technologies, Seattle, USA) at The Ohio State University Nucleic Acid Core Facility.

### Copy number analysis

DNA was extracted with sufficient quality from 67 fresh-frozen samples of our proprietary cohort of glioblastomas and processed on SNP6.0 Affymetrix chips according to manufacturer's recommendations. One outlier was removed after principal component analysis, and 66 samples were evaluable for analysis. Further details are described in the supplementary methods (S2 Appendix).

### Tissue microarrays and immunohistochemistry

TMAs were constructed including archival glioblastoma tissue from 220 patients, and were processed as reported previously [27]. Immunohistochemistry was performed, as described previously [27, 28] and in the supplementary methods (S2 Appendix), with antibodies against c-Rel, NF- $\kappa$ B p65 (phospho-S276), STAT3 (phospho-Y705), anti-C/EBP $\beta$ , anti-CD133 and anti-GFAP- $\delta$ .

Protein expression evaluation was evaluated with blinding to the clinical data, under supervision of a senior neuropathologist (WS). The percentage of nuclear and/or cytoplasmic

staining was scored on triplicate tumor cores as: 0, negative; 1, 1–25% positive cells; 2, 26–50% positive cells; 3, 51–75% positive cells and 4, 76–100% positive cells.

The percentage of positive GFAP- $\delta$  staining was calculated per sample. A mean staining score was computed per patient. Scores were analyzed with Mann Whitney U tests.

### Analysis of TCGA/TCIA MRI and mRNA / miRNA expression data

Preoperative gadolinium-enhanced T1-weighted MRI scans from the The Cancer Genome Atlas (TCGA) glioblastoma patients were downloaded from The Cancer Imaging Archive (TCIA; September 2015) and assessed for SVZ contact as described above. Researchers were blinded to the clinical data. A total of 222 patients could be included in the Cox regression analyses. Corresponding TCGA molecular classification and gene expression data were obtained for 228 and 223 patients, as described above and in the supplementary methods (S2 Appendix). Level 3 miRNA expression data from 236 glioblastomas was downloaded from the TCGA data portal (December 2015). MiRNA expression levels in glioblastomas with and without SVZ contact were analyzed with the 'limma' and 'heatmap3' package (R v3.2.2).

### Survival analyses

Statistical analyses were performed with use of SPSS 25.0 (IBM, Armonk, USA). All statistical tests were two-sided, and a P value < 0.05 was considered statistically significant.

Kaplan-Meier curves were analyzed with the log-rank test. Cox regression was used for the survival analyses. The proportional hazards assumption of the Cox model was tested (details in supplementary methods (S2 Appendix)) [27]. Multivariable Cox regression was performed including the variables SVZ status, age, KPS, type of surgery, adjuvant treatment and a time-dependent variable for KPS. In a multivariable complete case analysis, 595 patients could be included. As a sensitivity analysis, multiple imputation was performed to include all 647 patients. Next, a Cox regression analysis was performed including the variables tumor volume, type of surgery, postoperative treatment, CTCAE grade 3–5 complications and time-dependent variables for KPS and tumor volume to explore underlying factors that could influence the observed prognostic effect. Missing values were imputed in this analysis.

Survival analyses with TCGA/TCIA data were performed as described above. Multivariable Cox regression was performed including age and KPS variables in the model. Multiple imputation based on these variables was performed for missing data, to include all 222 TCGA/TCIA-glioblastoma patients of which survival and MRI data was available.

## Results

### SVZ contact is an independent prognostic factor in glioblastoma

SVZ status could not be determined for 36 patients (5.6%) of our cohort, due to unavailable MRI scans. Of the remaining 611 glioblastoma patients, 371 (57.3%) had an SVZ-contacting tumor on the preoperative MRI (Fig 2A and 2B). SVZ-contacting tumors were significantly associated with worse prognosis (median survival: 241 days from surgery; 95%CI: 203.6 to 278.4) compared to tumors without SVZ contact (median survival: 384 days; 95%CI: 338.9 to 429.1, log-rank test (Fig 2C;  $P < 0.0005$ ), unadjusted HR: 1.70; 95%CI: 1.40 to 2.05,  $P < 0.0005$ , Table 2). Multivariable complete case Cox regression ( $n = 595$ ) with correction for age, preoperative KPS, type of surgery and adjuvant treatment showed that SVZ contact remained independently associated with worse overall survival (Adjusted HR: 1.57; 95%CI: 1.29 to 1.91;  $P < 0.0005$ ; Table 2). Multiple imputation allowed for inclusion of all patients ( $n = 647$ ) in this

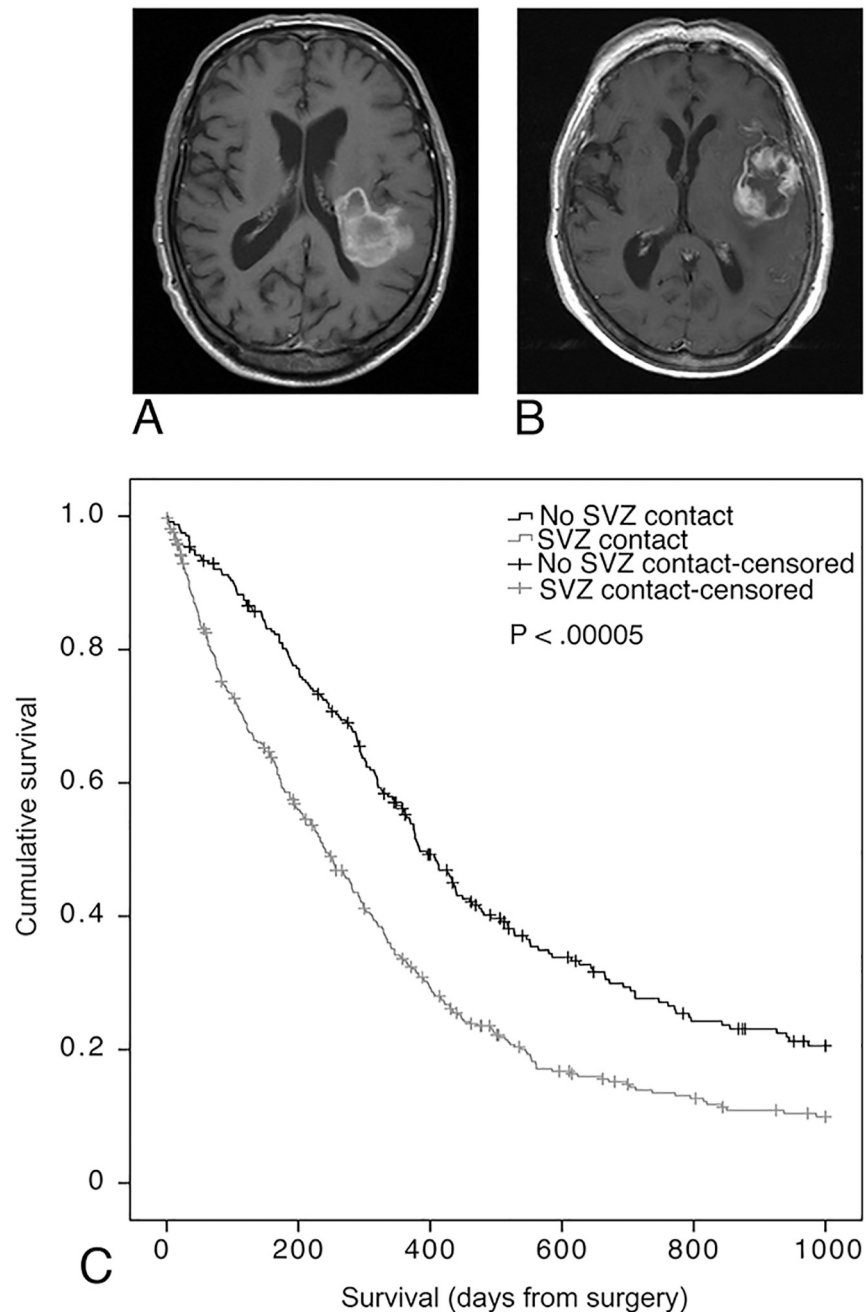

**Fig 2. SVZ involvement associates with glioblastoma patient survival.** A. Pre-operative T1-weighted MRI scan with gadolinium of patient (M, 1928) with glioblastoma contacting the SVZ. B. Pre-operative T1-weighted MRI scan with gadolinium of patient (F, 1925) with glioblastoma not contacting the SVZ. C. Association of tumor contact with the SVZ on glioblastoma patient survival. Kaplan-Meier plot of glioblastoma patients with a tumor contacting the SVZ (grey) and patients with a tumor that does not contact the SVZ (black). Patients with survival over 1000 days from surgery were censored. Survival was significantly different between the two groups (log-rank test,  $P < 0.00005$ ).

<https://doi.org/10.1371/journal.pone.0222717.g002>

multivariable analysis and did not alter the results (Adjusted HR:1.50; 95%CI: 1.24 to 1.82;  $P < 0.0005$ ). IDH1 mutational status was only available for a subset of the total cohort ( $n = 343$  of 647 patients) and did not correlate with SVZ contact (Chi-square test,  $p = 0.21$ , Table 1).



Table 2. Cox regression analysis—prognostic model.

| Variable           | Crude HR (95% CI) | P-value  | Adjusted HR (95% CI) | P-value  |
|--------------------|-------------------|----------|----------------------|----------|
| SVZ contact        | 1.70 (1.40–2.05)  | < 0.0005 | 1.57 (1.29–1.91)     | < 0.0005 |
| Gender (male)      | 1.05 (0.88–1.26)  | 0.57     | -                    | -        |
| Age                | 1.03 (1.03–1.04)  | < 0.0005 | 1.01 (1.01–1.02)     | 0.002    |
| KPS < 70           | 1.00              |          | 1.00                 |          |
| KPS ≥ 70           | 0.44 (0.36–0.53)  | < 0.0005 | 0.53 (0.37–0.74)     | < 0.0005 |
| KPS * time         |                   |          | 1.002 (1.001–1.003)  | 0.003    |
| Biopsy             | 1.00              |          | 1.00                 |          |
| Resection          | 0.39 (0.33–0.47)  | <0.0005  | 0.65 (0.53–0.80)     | <0.0005  |
| Adjuvant treatment |                   |          |                      |          |
| None               | 1.00              |          | 1.00                 |          |
| RT only            | 0.15 (0.11–0.19)  | <0.0005  | 0.20 (0.15–0.26)     | <0.0005  |
| RT + TMZ           | 0.05 (0.04–0.06)  | <0.0005  | 0.08 (0.06–0.11)     | <0.0005  |

Abbreviations: HR: hazard ratio; KPS: Karnofsky performance score; SVZ: subventricular zone; RT: radiotherapy; TMZ: temozolomide.

<https://doi.org/10.1371/journal.pone.0222717.t002>

SVZ contact was also a negative prognostic factor in the TCGA/TCIA dataset both in univariable analyses (log-rank  $P < 0.05$ ; Unadjusted HR: 1.43; 95%CI: 1.06 to 1.91;  $P < 0.05$ ) and after correction for age and KPS (Adjusted HR: 1.37; 95%CI: 1.02 to 1.84;  $P < 0.05$ ).

### Patient- and tumor-related clinical factors do not explain the prognostic effect of SVZ contact in glioblastoma

SVZ-contacting tumors exhibited larger tumor volumes compared to tumors without SVZ contact (Mann-Whitney U test,  $P < 0.0005$ , Table 1). Patients with a glioblastoma contacting the SVZ had a lower preoperative KPS ( $\chi^2$ -test;  $P = 0.01$ ), underwent more biopsy procedures ( $P < 0.0005$ ) and were less often treated with adjuvant chemoradiation ( $P < 0.0005$ ). In addition, 16.7% of patients with an SVZ-contacting tumor experienced at least one CTCAE grade 3–5 complication in the 30-day postoperative period, compared to 10.5% of patients with a tumor without SVZ contact ( $\chi^2$ -test;  $P < 0.05$ , Table 1). No statistically significant difference in the prevalence of postoperative cerebral hemorrhage/ischemia, epilepsy, infection/meningitis, hydrocephalus or thrombosis. Patients with an SVZ-contacting tumor did more often experience metabolic complications, such as hyponatremia ( $P = 0.005$ ), and hyperglycemia ( $P < 0.05$ ).

After inclusion of these factors in the multivariable Cox model, SVZ contact remained a significant prognostic factor in glioblastoma patients (adjusted HR: 1.42; 95%CI: 1.13 to 1.77,  $P < 0.01$ , Table 3).

### SVZ contact, gene, and miRNA expression pattern

We analyzed the mRNA expression in 71 UMCU glioblastoma samples (39 (54.9%) with SVZ contact and 32 (45.1%) without SVZ contact) and 223 TCGA/TCIA samples (128 (57%) with SVZ contact and 96 (43%) without SVZ contact). The molecular subtype distribution of the glioblastomas [31] was not different between the groups in both the UMCU (Fisher’s exact test,  $P = 1.0$ ) and TCGA/TCIA datasets ( $\chi^2$ -test,  $P = 0.11$ , S1 Fig). After correction for multiple testing ( $FDR < 0.05$ ), no differentially expressed single gene was detected between the groups in both datasets (S2 and S3 Figs). Likewise, no miRNA was differentially expressed between the two groups in both UMCU and TCGA/TCIA cohorts (S4 and S5 Figs).

Table 3. Cox regression analyses—explanatory multivariable analysis.

| Variable                      | Crude HR (95% CI)   | P-value  | Adjusted HR (95% CI) | P-value  |
|-------------------------------|---------------------|----------|----------------------|----------|
| SVZ contact                   | 1.70 (1.40–2.05)    | < 0.0005 | 1.42 (1.13–1.77)     | 0.003    |
| Age                           | 1.03 (1.03–1.04)    | < 0.0005 | 1.02 (1.01–1.02)     | < 0.0005 |
| KPS < 70                      | 1.00                |          | 1.00                 |          |
| KPS ≥ 70                      | 0.44 (0.36–0.53)    | < 0.0005 | 0.56 (0.40–0.78)     | 0.001    |
| KPS * time                    |                     |          | 1.002 (1.001–1.003)  | 0.002    |
| Biopsy                        | 1.00                |          | 1.00                 |          |
| Resection                     | 0.39 (0.33–0.47)    | < 0.0005 | 0.58 (0.47–0.72)     | < 0.0005 |
| Adjuvant treatment            |                     |          |                      |          |
| None                          | 1.00                |          | 1.00                 |          |
| RT only                       | 0.15 (0.11–0.19)    | < 0.0005 | 0.18 (0.14–0.25)     | < 0.0005 |
| RT + TMZ                      | 0.05 (0.04–0.06)    | < 0.0005 | 0.08 (0.06–0.12)     | < 0.0005 |
| Tumor volume                  | 1.002 (0.999–1.005) | 0.13     | 1.009 (1.005–1.014)  | < 0.0005 |
| Tumor volume * time           |                     |          | 1.000 (1.000–1.000)  | < 0.0005 |
| Complications grade CTCAE 3–5 | 0.55 (0.44–0.70)    | < 0.0005 | 1.21 (0.94–1.55)     | 0.14     |

Abbreviations: HR: hazard ratio; KPS: Karnofsky performance score; SVZ: subventricular zone; RT: radiotherapy; TMZ: temozolomide.

<https://doi.org/10.1371/journal.pone.0222717.t003>

Exploratory GSEA with the C1 positional gene sets showed an enrichment of the chr9q34 gene set in tumors without SVZ contact ( $P < 0.001$ ,  $FDR = 0.038$ ) in the UMCU dataset and downregulation of gene sets corresponding to cytogenetic bands chr3q22–23, chr3p24–25, chr3q26–29 and chr19p12 ( $P < 0.01$ ;  $FDR < 0.25$ ) in tumors without SVZ contact in the TCGA/TCIA data (S1 Table). The DNA analysis of our samples did however not reveal any significant difference in copy number in any area of the genome between both groups ( $FDR > 0.5$  for all cytobands).

Tumors without SVZ contact also presented an increased activation of genes with promoter regions containing the motifs GTCNYYATGR (unknown target,  $P < 0.001$ ,  $FDR = 0.24$ ) and GCGNNANTTCC ( $P = 0.002$ ,  $FDR = 0.23$ ), which is an NF- $\kappa$ B C-rel regulatory motif [32] in the UMCU cohort. Differential activation of genes containing these regulatory motifs was not confirmed in TCGA/TCIA tumors, which only showed an enrichment of genes upregulated by Bmi-1 knockdown in tumors without SVZ contact ( $P = 0.004$ ,  $FDR = 0.19$ ). Bmi-1 is known to induce NF- $\kappa$ B signaling in glioma cells [33].

### Differential activation of proteins involved in (epithelial-) mesenchymal transformation in glioblastomas contacting the SVZ

Since neural stem cells are a core component of the SVZ, it can be hypothesized that their presence might explain the adverse prognostic effect of SVZ contact in glioblastomas. Also, activation of mesenchymal genes is associated with poor prognosis in glioblastoma patients [34]. This may not always be fully recapitulated by gene expression data. Therefore, we analyzed the protein expression patterns of neural stem cell markers CD133 [35] and GFAP- $\delta$  [36], and the activation of key markers of (epithelial-) mesenchymal transformation C/EBP- $\beta$ , NF- $\kappa$ B (P<sup>S536</sup>-p65 and c-Rel) and STAT3 [34] (Fig 3) on FFPE tumor tissue obtained from a cohort of consecutive glioblastoma patients. Baseline characteristics of this cohort were comparable to the overall dataset. No differences in CD133 ( $n = 141$  evaluable tumors) or GFAP- $\delta$  ( $n = 147$ ) expression were observed between tumors with or without SVZ contact. In contrast, we observed increased nuclear expression levels of C/EBP- $\beta$  ( $n = 191$ , Mann Whitney U test,  $P = 0.029$ ) and P<sup>Y705</sup>-STAT3 ( $n = 192$ , Mann Whitney U test,  $P = 0.002$ ), but not of NF- $\kappa$ B subunits P<sup>S536</sup>-p65, or c-Rel in SVZ-contacting tumors.



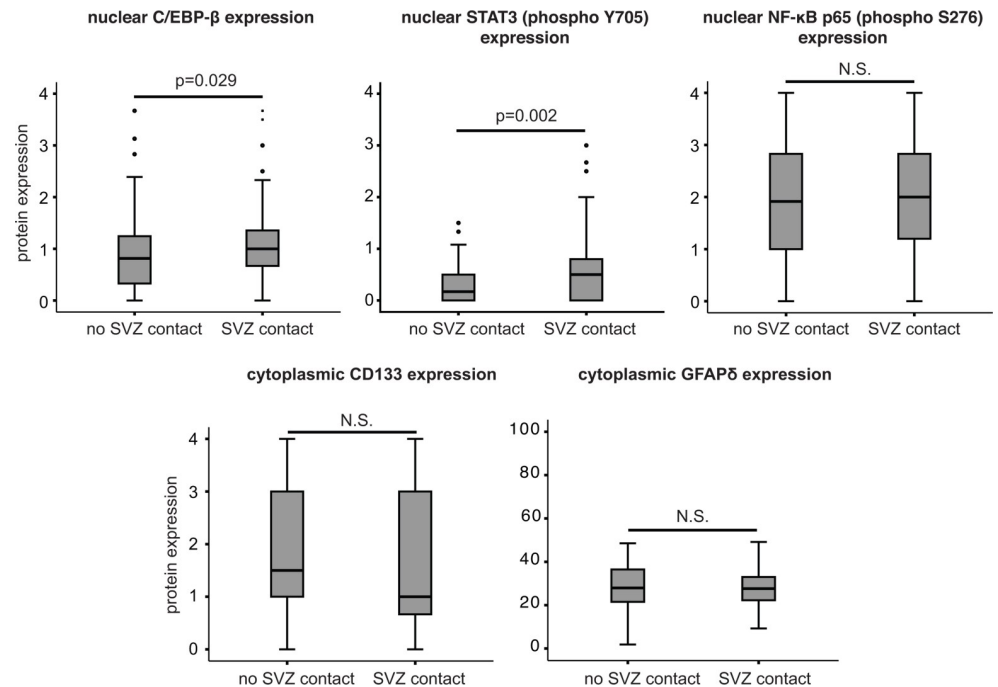

**Fig 3. SVZ involvement in glioblastoma correlates with increased protein expression of key markers of (epithelial-) mesenchymal transformation.** Increased protein expression levels of (epithelial-)mesenchymal transformation markers C/EBP- $\beta$  (Mann Whitney U test,  $P = 0.029$ ) and P<sup>Y705</sup>-STAT3 (Mann Whitney U test,  $P = 0.002$ ), but not P<sup>S536</sup>-p65, were observed in glioblastomas contacting the SVZ. No expression differences in stem cell markers CD133 or GFAP- $\delta$  were observed between tumors with or without SVZ contact.

<https://doi.org/10.1371/journal.pone.0222717.g003>

## Discussion

In a large institutional cohort ( $n = 647$ ) and a cohort from the TCIA/TCGA repository ( $n = 222$ ), we show that contact between the gadolinium-enhancing, T1-weighted imaging core component of glioblastomas and the SVZ of the brain is an adverse prognostic factor, independent of other known prognostic factors age, preoperative KPS, surgery type and post-operative treatment [37]. These results considerably strengthen the associations found by others, who had explored this hypothesis with univariable survival models [14, 16, 17, 38–40] or smaller to mid-size cohorts [17, 18, 41–46], and may help define the prognosis of individual patients based on their preoperative MR imaging. A meta-analysis of these published series also showed a significant adverse prognostic effect of SVZ contact in glioblastoma patients [47], but these analyses were not corrected for the effects of other (clinical) factors, due to unavailable individual patient data. Our findings in multivariable analyses in two large cohorts, extend and validate these previous results [18, 43, 47], and point towards a true independent prognostic effect. Most importantly, we observed that this prognostic effect was independent from tumor volume and postoperative complications. In a recent study of 35 glioblastoma patients it was shown that O-(2-[18F]fluoroethyl)-L-tyrosine (FET) PET scans can show SVZ infiltration of glioblastomas that is not visible on MRI scans, which is correlated to larger tumor volumes [48]. Further exploration of the correlations between SVZ contact on MRI, FET PET scans, tumor volume and prognosis of glioblastoma patients may further elucidate the biomechanical backgrounds of SVZ contact in glioblastoma.

Deep-seated tumors present an increased surgical risk [49], and are more likely to be biopsied rather than resected as compared to superficial glioblastomas. In our cohort,

periventricular tumors were indeed more often biopsied than superficial ones. Tumor resection is known to improve survival in glioblastomas, as compared to biopsies [50, 51]. Aside from their potential lethal consequences, complications could also delay or prevent optimal post-operative adjuvant cytotoxic treatment. In our cohort as well, patients with an SVZ contacting tumor experienced more serious (CTCAE grade 3–5) complications. At our center, the main criterion for glioblastoma patients to come in consideration for adjuvant combined therapy is having a KPS score  $> 70$ . Our patients with a preoperative  $KPS \geq 70$  and an SVZ-contacting tumor were however ultimately significantly less often allocated to chemoradiation (as opposed to less optimal monotherapies) after surgery than patients with a glioblastoma without SVZ contact ( $\chi^2$ -test,  $P < 0.0001$ ), as a result of a decrease of KPS.

Given that SVZ-contact remained an independent prognostic factor in our multivariable survival analyses taking the type of surgery, post-operative complications and adjuvant treatment into account, other factors must contribute to the survival disadvantage of ventricular contact.

It has been suggested that SVZ-contacting glioblastomas present different biological characteristics than tumors without SVZ contact. Based on mRNA arrays, differential expression level of VEGF, HGF, CHI3L1, RAP2A, HES4, DLL3, PIR and HJURP, of several oncological transcriptomic (Notch, stem cell, hypoxia, angiogenesis and invasion) and inflammatory signatures have for instance variably been reported [16, 22, 25, 26]. An increased expression of mesenchymal markers (VEGF, HGF) was also observed by targeted q-RT PCR in SVZ-contacting tumors and differential expression of NOTCH1, CD133 and CHI3L1 was found between distinct periventricular regions [25]. A proteomic analysis of SVZ contacting tumors has also suggested a differential expression of vimentin, RBP1 and Lupus La, as well as an association with carbohydrate metabolism, blood coagulation, protease inhibitors and ECM pathways [24]. Our gene and miRNA expression analyses performed on proprietary samples and TCGA tumors, i.e. the largest cohorts analyzed to this end so far, could not replicate any of these results. In fact, even the findings of miRNA ( $n = 67$ ) and gene expression ( $n = 71$ ) analyses on our proprietary samples could not be reproduced in the larger TCGA/TCIA cohorts. This underscores the exploratory value of gene expression analyses and GSEA when performed on small or intermediate-size cohorts and the importance to validate them with other techniques or on larger samples prior to drawing any conclusions.

Steed et al. also observed that proneural and neural tumors from the TCIA grew frequently closer (as measured by the distance to those structures) to the SVZ than mesenchymal and classical ones [52]. Using the same dataset however and our clinician-friendly definition of SVZ contact based on the enhancing tumor core rather than a complex image analysis algorithm, we did not find any association between molecular subtype and SVZ contact in this same TCGA/TCIA and our cohorts. Our results are in line with a recent report of similar analyses to explore this hypothesis with the TCGA/TCIA dataset [46].

A limitation of gene expression analyses is the dependence on the presence of sufficient tumor material, favoring the recruitment of samples from debulking surgeries rather than from needle biopsies. Both our proprietary fresh-frozen samples and the TCGA samples indeed consist of surgical debulking tumor samples, without any needle biopsy samples. Biopsies were however significantly overrepresented in SVZ-contacting glioblastomas (41.5% versus 22.9%, Table 1,  $P < 0.0005$ ) in our consecutive patient cohort, and expression analyses may thus underrepresent the most aggressive/inoperable tumors. To minimize this bias, we also analyzed protein expression/activation patterns on TMAs that included the tumor tissues obtained from both biopsies and open surgeries of a subset of 220 consecutive patients. These analyses did not provide evidence for any association between SVZ contact and the expression of neural stem cell markers (CD133 [35] and GFAP- $\delta$  [36]). This finding is congruent with a

previous report [16], but contradicts another one based on microarray data [26]. Our gene set enrichment analyses suggested that SVZ contact could associate with increased NF- $\kappa$ B activity in glioma. This was however not confirmed at a protein level, as nuclear phospho-p65 and c-Rel protein expression did not differ between groups. In contrast, our proteomic analyses showed higher activation of C/EBP- $\beta$  and STAT3 signaling in tumors contacting the SVZ. These transcription factors are hallmarks of (epithelial-)mesenchymal transformation in glioma, which is associated with poor prognosis in glioblastoma [34, 53, 54], and might prevail in SVZ-contacting glioblastomas compared to tumors without SVZ contact. Further research is needed to establish whether these observations represent intrinsic biological properties of tumors contacting the SVZ or are regional effects mediated by the SVZ microenvironment.

Due to the retrospective nature of our study, some established prognostic factors such as MGMT methylation status, Mini Mental State Exam (MMSE) score and use of corticosteroids [36] could not be included in our Cox model, as these data were too often unavailable. In addition, the patients in our study were diagnosed based on the WHO 2007 Classification of Tumours of the Central Nervous System [55] and IDH1 mutational status was only available for a subset of the patients, as it was not yet evaluated in routine clinical care. However, in a subset analysis, an IDH1 mutation was found in only 21 (6.1%) of 343 glioblastoma patients, and did not correlate to tumor contact with the SVZ. Based on these observations and the other baseline characteristics, we expect that the study cohort and study results are representative for patients with glioblastoma, IDH1 wildtype, according to the new classification system [56].

Despite these shortcomings, our cumulative results show that contact with the SVZ correlates with increased expression of markers of epithelial-mesenchymal transformation of glioblastomas, and is a significant adverse prognostic factor in these tumors, independent of age, performance status, tumor volume, type of surgery, postoperative complications and adjuvant treatment. We found no correlations between SVZ contact and molecular subtype, distinct gene expression patterns, or markers of stem cellness.

## Supporting information

### S1 Appendix. Clinical dataset.

(XLSX)

### S2 Appendix. Supplementary methods.

(PDF)

**S1 Fig. Molecular classification.** No significant difference in molecular subclass distribution was detected between SVZ contacting glioblastomas and tumors not contacting the SVZ in the UMCU cohort (Fisher's exact test,  $P = 1.0$ ) and the TCGA cohort ( $\chi^2$ -test,  $P = 0.11$ ).

(PDF)

**S2 Fig. RNA expression analysis UMCU cohort.** Gene expression patterns of the 1000 RNA microarray probes with the highest standard deviation in the UMCU cohort. Gene expression patterns do not cluster to SVZ status or batch. No significantly differentially expressed genes were observed after correction for multiple testing ( $FDR < 0.05$ ).

(TIF)

**S3 Fig. RNA expression analysis TCGA cohort.** Gene expression patterns of the 1000 RNA microarray probes with the highest standard deviation in the TCGA cohort. Gene expression patterns do not cluster to SVZ status or batch. No significantly differentially expressed genes

were observed after correction for multiple testing (FDR < 0.05).  
(TIF)

**S4 Fig. MiRNA expression analysis UMCU cohort.** MiRNA expression patterns of the 100 probes with the highest standard deviation in the UMCU cohort. 67 samples from our institute were included in this analysis. miRNA expression patterns did not cluster to SVZ status. No differentially expressed miRNAs were observed after correction for multiple testing (FDR < 0.05).  
(TIF)

**S5 Fig. MiRNA expression analysis TCGA cohort.** MiRNA expression patterns of the 100 probes with the highest standard deviation in the TCGA cohort. miRNA expression patterns did not cluster to SVZ status. No differentially expressed miRNAs were observed after correction for multiple testing (FDR < 0.05).  
(TIF)

**S1 Table. Gene set enrichment analysis.** Gene set enrichment in glioblastomas without SVZ contact compared to glioblastomas with SVZ contact. RNA expression data from the UMCU cohort (upper panel) and TCGA dataset (lower panel) was used. Abbreviations: ES: enrichment score; FDR: false discovery rate.  
(DOCX)

## Acknowledgments

The authors would like to acknowledge C.H. Poulet for his help with the molecular classification of the tumors.

## Author Contributions

**Conceptualization:** Sharon Berendsen, Laurent Schoysman, Pierre A. Robe.

**Data curation:** Sharon Berendsen, Wim G. M. Spliet, Marjolein Geurts, Jeroen Hendrikse, Laurent Schoysman, Willemijn B. Huiszoon, Meri Varkila, Soufyan Rouss, Erica H. Bell, Jérôme Kroonen.

**Formal analysis:** Sharon Berendsen, Emma van Bodegraven, Marjolein Geurts, Jeroen Hendrikse, Laurent Schoysman, Erica H. Bell, Jérôme Kroonen, Tom J. Snijders, Pierre A. Robe.

**Funding acquisition:** Tatjana Seute, Arnab Chakravarti, Vincent Bours, Pierre A. Robe.

**Investigation:** Sharon Berendsen, Emma van Bodegraven, Marjolein Geurts, Laurent Schoysman, Erica H. Bell, Jérôme Kroonen, Pierre A. Robe.

**Methodology:** Sharon Berendsen, Emma van Bodegraven, Wim G. M. Spliet, Marjolein Geurts, Jeroen Hendrikse, Laurent Schoysman, Erica H. Bell, Jérôme Kroonen, Arnab Chakravarti, Tom J. Snijders, Pierre A. Robe.

**Project administration:** Sharon Berendsen, Arnab Chakravarti.

**Resources:** Sharon Berendsen, Tatjana Seute, Wim G. M. Spliet, Arnab Chakravarti, Vincent Bours, Tom J. Snijders, Pierre A. Robe.

**Software:** Sharon Berendsen, Jeroen Hendrikse, Pierre A. Robe.

**Supervision:** Wim G. M. Spliet, Jeroen Hendrikse, Erica H. Bell, Jérôme Kroonen, Arnab Chakravarti, Vincent Bours, Tom J. Snijders, Pierre A. Robe.

**Validation:** Sharon Berendsen, Pierre A. Robe.

**Visualization:** Sharon Berendsen, Pierre A. Robe.

**Writing – original draft:** Sharon Berendsen, Marjolein Geurts, Tom J. Snijders, Pierre A. Robe.

**Writing – review & editing:** Sharon Berendsen, Emma van Bodegraven, Tatjana Seute, Wim G. M. Spliet, Marjolein Geurts, Jeroen Hendrikse, Laurent Schoysman, Willemijn B. Huiszoon, Meri Varkila, Soufyan Rouss, Erica H. Bell, Jérôme Kroonen, Arnab Chakravarti, Vincent Bours, Tom J. Snijders, Pierre A. Robe.

## References

1. Stupp R, Taillibert S, Kanner AA, Kesari S, Steinberg DM, Toms SA, et al. Maintenance Therapy With Tumor-Treating Fields Plus Temozolomide vs Temozolomide Alone for Glioblastoma: A Randomized Clinical Trial. *JAMA*. 2015; 314(23):2535–43. <https://doi.org/10.1001/jama.2015.16669> PMID: 26670971
2. Ellingson BM, Cloughesy TF, Pope WB, Zaw TM, Phillips H, Lalezari S, et al. Anatomic localization of O6-methylguanine DNA methyltransferase (MGMT) promoter methylated and unmethylated tumors: a radiographic study in 358 de novo human glioblastomas. *NeuroImage*. 2012; 59(2):908–16. <https://doi.org/10.1016/j.neuroimage.2011.09.076> PMID: 22001163
3. Smith TR, Hulou MM, Abecassis J, Das S, Chandler JP. Use of preoperative FLAIR MRI and ependymal proximity of tumor enhancement as surrogate markers of brain tumor origin. *Journal of Clinical Neuroscience: Official Journal of the Neurosurgical Society of Australasia*. 2015; 22(9):1397–402. <https://doi.org/10.1016/j.jocn.2015.02.029> PMID: 26055954
4. Sanai N, Alvarez-Buylla A, Berger MS. Neural stem cells and the origin of gliomas. *The New England Journal of Medicine*. 2005; 353(8):811–22. <https://doi.org/10.1056/NEJMra043666> PMID: 16120861
5. Wang Y, Yang J, Zheng H, Tomasek GJ, Zhang P, McKeever PE, et al. Expression of mutant p53 proteins implicates a lineage relationship between neural stem cells and malignant astrocytic glioma in a murine model. *Cancer Cell*. 2009; 15(6):514–26. <https://doi.org/10.1016/j.ccr.2009.04.001> PMID: 19477430
6. Lee JH, Lee JE, Kahng JY, Kim SH, Park JS, Yoon SJ, et al. Human glioblastoma arises from subventricular zone cells with low-level driver mutations. *Nature*. 2018; 560(7717):243–7. Epub 2018/08/03. <https://doi.org/10.1038/s41586-018-0389-3> PMID: 30069053.
7. Kroonen J, Nassen J, Boulanger YG, Provenzano F, Capraro V, Bours V, et al. Human glioblastoma-initiating cells invade specifically the subventricular zones and olfactory bulbs of mice after striatal injection. *International Journal of Cancer*. 2011; 129(3):574–85. <https://doi.org/10.1002/ijc.25709> PMID: 20886597
8. Bao S, Wu Q, Sathornsumetee S, Hao Y, Li Z, Hjelmeland AB, et al. Stem cell-like glioma cells promote tumor angiogenesis through vascular endothelial growth factor. *Cancer Research*. 2006; 66(16):7843–8. <https://doi.org/10.1158/0008-5472.CAN-06-1010> PMID: 16912155
9. Lee P, Eppinga W, Lagerwaard F, Cloughesy T, Slotman B, Nghiemphu PL, et al. Evaluation of high ipsilateral subventricular zone radiation therapy dose in glioblastoma: a pooled analysis. *Int J Radiat Oncol Biol Phys*. 2013; 86(4):609–15. Epub 2013/03/07. <https://doi.org/10.1016/j.ijrobp.2013.01.009> PMID: 23462418.
10. Goffart N, Kroonen J, Di Valentin E, Dedobbeleer M, Denne A, Martinive P, et al. Adult mouse subventricular zones stimulate glioblastoma stem cells specific invasion through CXCL12/CXCR4 signaling. *Neuro-Oncology*. 2015; 17(1):81–94. <https://doi.org/10.1093/neuonc/nou144> PMID: 25085362
11. Goffart N, Lombard A, Lallemand F, Kroonen J, Nassen J, Di Valentin E, et al. CXCL12 mediates glioblastoma resistance to radiotherapy in the subventricular zone. *Neuro-Oncology*. 2017; 19(1):66–77. Epub 2016/07/03. <https://doi.org/10.1093/neuonc/now136> PMID: 27370398; PubMed Central PMCID: PMC5193023.
12. Chen L, Chaichana KL, Kleinberg L, Ye X, Quinones-Hinojosa A, Redmond K. Glioblastoma recurrence patterns near neural stem cell regions. *Radiotherapy and Oncology: Journal of the European Society for Therapeutic Radiology and Oncology*. 2015; 116(2):294–300. <https://doi.org/10.1016/j.radonc.2015.07.032> PMID: 26276527

13. Chen J, Li Y, Yu TS, McKay RM, Burns DK, Kernie SG, et al. A restricted cell population propagates glioblastoma growth after chemotherapy. *Nature*. 2012; 488(7412):522–6. <https://doi.org/10.1038/nature11287> PMID: 22854781
14. Adeberg S, Konig L, Bostel T, Harrabi S, Welzel T, Debus J, et al. Glioblastoma recurrence patterns after radiation therapy with regard to the subventricular zone. *Int J Radiat Oncol Biol Phys*. 2014; 90(4):886–93. Epub 2014/09/16. <https://doi.org/10.1016/j.ijrobp.2014.07.027> PMID: 25220720.
15. Lim DA, Cha S, Mayo MC, Chen MH, Keles E, VandenBerg S, et al. Relationship of glioblastoma multiforme to neural stem cell regions predicts invasive and multifocal tumor phenotype. *Neuro-Oncology*. 2007; 9(4):424–9. <https://doi.org/10.1215/15228517-2007-023> PMID: 17622647
16. Kappadakunnel M, Eskin A, Dong J, Nelson SF, Mischel PS, Liau LM, et al. Stem cell associated gene expression in glioblastoma multiforme: relationship to survival and the subventricular zone. *Journal of Neuro-Oncology*. 2010; 96(3):359–67. Epub 2009/08/06. <https://doi.org/10.1007/s11060-009-9983-4> PMID: 19655089; PubMed Central PMCID: PMC2808508.
17. Chaichana KL, McGirt MJ, Frazier J, Attenello F, Guerrero-Cazares H, Quinones-Hinojosa A. Relationship of glioblastoma multiforme to the lateral ventricles predicts survival following tumor resection. *Journal of Neuro-Oncology*. 2008; 89(2):219–24. Epub 2008/05/07. <https://doi.org/10.1007/s11060-008-9609-2> PMID: 18458819.
18. Jungk C, Warta R, Mock A, Friauf S, Hug B, Capper D, et al. Location-Dependent Patient Outcome and Recurrence Patterns in IDH1-Wildtype Glioblastoma. *Cancers*. 2019; 11(1). Epub 2019/01/24. <https://doi.org/10.3390/cancers11010122> PMID: 30669568; PubMed Central PMCID: PMC6356480.
19. Gevaert O, Mitchell LA, Achrol AS, Xu J, Echegaray S, Steinberg GK, et al. Glioblastoma multiforme: exploratory radiogenomic analysis by using quantitative image features. *Radiology*. 2014; 273(1):168–74. <https://doi.org/10.1148/radiol.14131731> PMID: 24827998
20. Diehn M, Nardini C, Wang DS, McGovern S, Jayaraman M, Liang Y, et al. Identification of noninvasive imaging surrogates for brain tumor gene-expression modules. *Proceedings of the National Academy of Sciences of the United States of America*. 2008; 105(13):5213–8. <https://doi.org/10.1073/pnas.0801279105> PMID: 18362333
21. Gutman DA, Cooper LA, Hwang SN, Holder CA, Gao J, Aurora TD, et al. MR imaging predictors of molecular profile and survival: multi-institutional study of the TCGA glioblastoma data set. *Radiology*. 2013; 267(2):560–9. <https://doi.org/10.1148/radiol.13120118> PMID: 23392431
22. Jungk C, Mock A, Exner J, Geisenberger C, Warta R, Capper D, et al. Spatial transcriptome analysis reveals Notch pathway-associated prognostic markers in IDH1 wild-type glioblastoma involving the subventricular zone. *BMC Med*. 2016; 14(1):170. Epub 2016/10/27. <https://doi.org/10.1186/s12916-016-0710-7> PMID: 27782828; PubMed Central PMCID: PMC5080721.
23. Itakura H, Achrol AS, Mitchell LA, Loya JJ, Liu T, Westbroek EM, et al. Magnetic resonance image features identify glioblastoma phenotypic subtypes with distinct molecular pathway activities. *Science Translational Medicine*. 2015; 7(303):303ra138. <https://doi.org/10.1126/scitranslmed.aaa7582> PMID: 26333934
24. Gollapalli K, Ghantasala S, Kumar S, Srivastava R, Rapole S, Moiyadi A, et al. Subventricular zone involvement in Glioblastoma—A proteomic evaluation and clinicoradiological correlation. *Sci Rep*. 2017; 7(1):1449. Epub 2017/05/05. <https://doi.org/10.1038/s41598-017-01202-8> PMID: 28469129; PubMed Central PMCID: PMC5431125.
25. Denicolai E, Tabouret E, Colin C, Metellus P, Nanni I, Boucard C, et al. Molecular heterogeneity of glioblastomas; does location matter? *Oncotarget*. 2015. <https://doi.org/10.18632/oncotarget.6433> PMID: 26637806
26. Jamshidi N, Diehn M, Bredel M, Kuo MD. Illuminating radiogenomic characteristics of glioblastoma multiforme through integration of MR imaging, messenger RNA expression, and DNA copy number variation. *Radiology*. 2014; 270(1):1–2. <https://doi.org/10.1148/radiol.13130078> PMID: 24056404
27. Berendsen S, Varkila M, Kroonen J, Seute T, Snijders TJ, Kauw F, et al. Prognostic relevance of epilepsy at presentation in glioblastoma patients. *Neuro-Oncology*. 2016; 18(5):700–6. Epub 2015/10/01. <https://doi.org/10.1093/neuonc/nov238> PMID: 26420896; PubMed Central PMCID: PMC4827038.
28. Berendsen S, Spliet WGM, Geurts M, Van Hecke W, Seute T, Snijders TJ, et al. Epilepsy Associates with Decreased HIF-1alpha/STAT5b Signaling in Glioblastoma. *Cancers*. 2019; 11(1). Epub 2019/01/10. <https://doi.org/10.3390/cancers11010041> PMID: 30621209.
29. Reich M, Liefeld T, Gould J, Lerner J, Tamayo P, Mesirov JP. GenePattern 2.0. *Nature Genetics*. 2006; 38(5):500–1. <https://doi.org/10.1038/ng0506-500> PMID: 16642009
30. Subramanian A, Tamayo P, Mootha VK, Mukherjee S, Ebert BL, Gillette MA, et al. Gene set enrichment analysis: a knowledge-based approach for interpreting genome-wide expression profiles. *Proceedings of the National Academy of Sciences of the United States of America*. 2005; 102(43):15545–50. <https://doi.org/10.1073/pnas.0506580102> PMID: 16199517



31. Verhaak RG, Hoadley KA, Purdom E, Wang V, Qi Y, Wilkerson MD, et al. Integrated genomic analysis identifies clinically relevant subtypes of glioblastoma characterized by abnormalities in PDGFRA, IDH1, EGFR, and NF1. *Cancer Cell*. 2010; 17(1):98–110. <https://doi.org/10.1016/j.ccr.2009.12.020> PMID: 20129251
32. Xie X, Lu J, Kulbokas EJ, Golub TR, Mootha V, Lindblad-Toh K, et al. Systematic discovery of regulatory motifs in human promoters and 3' UTRs by comparison of several mammals. *Nature*. 2005; 434(7031):338–45. <https://doi.org/10.1038/nature03441> PMID: 15735639
33. Jiang L, Song L, Wu J, Yang Y, Zhu X, Hu B, et al. Bmi-1 promotes glioma angiogenesis by activating NF-kappaB signaling. *PLoS One*. 2013; 8(1):e55527. Epub 2013/02/06. <https://doi.org/10.1371/journal.pone.0055527> PMID: 23383216; PubMed Central PMCID: PMC3561301.
34. Bhat KP, Balasubramanian V, Vaillant B, Ezhilarasan R, Hummelink K, Hollingsworth F, et al. Mesenchymal differentiation mediated by NF-kappaB promotes radiation resistance in glioblastoma. *Cancer Cell*. 2013; 24(3):331–46. <https://doi.org/10.1016/j.ccr.2013.08.001> PMID: 23993863
35. Singh SK, Hawkins C, Clarke ID, Squire JA, Bayani J, Hide T, et al. Identification of human brain tumour initiating cells. *Nature*. 2004; 432(7015):396–401. <https://doi.org/10.1038/nature03128> PMID: 15549107
36. Roelofs RF, Fischer DF, Houtman SH, Sluijs JA, Van Haren W, Van Leeuwen FW, et al. Adult human subventricular, subgranular, and subpial zones contain astrocytes with a specialized intermediate filament cytoskeleton. *Glia*. 2005; 52(4):289–300. <https://doi.org/10.1002/glia.20243> PMID: 16001427
37. Gorlia T, van den Bent MJ, Hegi ME, Mirimanoff RO, Weller M, Cairncross JG, et al. Nomograms for predicting survival of patients with newly diagnosed glioblastoma: prognostic factor analysis of EORTC and NCIC trial 26981-22981/CE.3. *The Lancet Oncology*. 2008; 9(1):29–38. Epub 2007/12/18. [https://doi.org/10.1016/S1470-2045\(07\)70384-4](https://doi.org/10.1016/S1470-2045(07)70384-4) PMID: 18082451.
38. Adeberg S, Bostel T, Konig L, Welzel T, Debus J, Combs SE. A comparison of long-term survivors and short-term survivors with glioblastoma, subventricular zone involvement: a predictive factor for survival? *Radiation Oncology (London, England)*. 2014; 9:95–717X-9-95. <https://doi.org/10.1186/1748-717X-9-95> PMID: 24758192
39. Matsuda M, Kohzuki H, Ishikawa E, Yamamoto T, Akutsu H, Takano S, et al. Prognostic analysis of patients who underwent gross total resection of newly diagnosed glioblastoma. *J Clin Neurosci*. 2018; 50:172–6. Epub 2018/02/06. <https://doi.org/10.1016/j.jocn.2018.01.009> PMID: 29396060.
40. Nakagawa Y, Sasaki H, Ohara K, Ezaki T, Toda M, Ohira T, et al. Clinical and Molecular Prognostic Factors for Long-Term Survival of Patients with Glioblastomas in Single-Institutional Consecutive Cohort. *World Neurosurg*. 2017; 106:165–73. Epub 2017/07/02. <https://doi.org/10.1016/j.wneu.2017.06.126> PMID: 28666913.
41. Jafri NF, Clarke JL, Weinberg V, Barani IJ, Cha S. Relationship of glioblastoma multiforme to the subventricular zone is associated with survival. *Neuro-Oncology*. 2013; 15(1):91–6. Epub 2012/10/26. <https://doi.org/10.1093/neuonc/nos268> PMID: 23095230; PubMed Central PMCID: PMC3534420.
42. Young GS, Macklin EA, Setayesh K, Lawson JD, Wen PY, Norden AD, et al. Longitudinal MRI evidence for decreased survival among periventricular glioblastoma. *Journal of Neuro-Oncology*. 2011; 104(1):261–9. <https://doi.org/10.1007/s11060-010-0477-1> PMID: 21132516
43. Mistry AM, Dewan MC, White-Dzuro GA, Brinson PR, Weaver KD, Thompson RC, et al. Decreased survival in glioblastomas is specific to contact with the ventricular-subventricular zone, not subgranular zone or corpus callosum. *Journal of Neuro-Oncology*. 2017; 132(2):341–9. Epub 2017/01/12. <https://doi.org/10.1007/s11060-017-2374-3> PMID: 28074322; PubMed Central PMCID: PMC5771712.
44. Weinberg BD, Boreta L, Braunstein S, Cha S. Location of subventricular zone recurrence and its radiation dose predicts survival in patients with glioblastoma. *Journal of Neuro-Oncology*. 2018; 138(3):549–56. Epub 2018/03/17. <https://doi.org/10.1007/s11060-018-2822-8> PMID: 29546530.
45. Woo P, Ho J, Lam S, Ma E, Chan D, Wong WK, et al. A Comparative Analysis of the Usefulness of Survival Prediction Models for Patients with Glioblastoma in the Temozolomide Era: The Importance of Methylguanine Methyltransferase Promoter Methylation, Extent of Resection, and Subventricular Zone Location. *World Neurosurg*. 2018; 115:e375–e85. Epub 2018/04/22. <https://doi.org/10.1016/j.wneu.2018.04.059> PMID: 29678708.
46. Mistry AM, Wooten DJ, Davis LT, Mobley BC, Quaranta V, Ihrle RA. Ventricular-Subventricular Zone Contact by Glioblastoma is Not Associated with Molecular Signatures in Bulk Tumor Data. *Sci Rep*. 2019; 9(1):1842. Epub 2019/02/14. <https://doi.org/10.1038/s41598-018-37734-w> PMID: 30755636; PubMed Central PMCID: PMC6372607.
47. Mistry AM. Clinical correlates of subventricular zone-contacting glioblastomas: a meta-analysis. *Journal of Neurosurgical Sciences*. 2017. <https://doi.org/10.23736/S0390-5616.17.04274-6>
48. Harat M, Malkowski B, Roszkowski K. Prognostic value of subventricular zone involvement in relation to tumor volumes defined by fused MRI and O-(2-[(18)F]fluoroethyl)-L-tyrosine (FET) PET imaging in

- glioblastoma multiforme. *Radiation Oncology* (London, England). 2019; 14(1):37. Epub 2019/03/06. <https://doi.org/10.1186/s13014-019-1241-0> PMID: 30832691; PubMed Central PMCID: PMC6398237.
49. Kongkham PN, Knifed E, Tamber MS, Bernstein M. Complications in 622 cases of frame-based stereotactic biopsy, a decreasing procedure. *The Canadian Journal of Neurological Sciences*. 2008; 35(1):79–84. <https://doi.org/10.1017/s0317167100007605> PMID: 18380282
  50. Sanai N, Polley MY, McDermott MW, Parsa AT, Berger MS. An extent of resection threshold for newly diagnosed glioblastomas. *Journal of Neurosurgery*. 2011; 115(1):3–8. <https://doi.org/10.3171/2011.2.JNS10998> PMID: 21417701
  51. Brown TJ, Brennan MC, Li M, Church EW, Brandmeir NJ, Rakszawski KL, et al. Association of the Extent of Resection With Survival in Glioblastoma: A Systematic Review and Meta-analysis. *JAMA Oncology*. 2016; 2(11):1460–9. Epub 2016/06/17. <https://doi.org/10.1001/jamaoncol.2016.1373> PMID: 27310651.
  52. Steed TC, Treiber JM, Patel K, Ramakrishnan V, Merk A, Smith AR, et al. Differential localization of glioblastoma subtype: implications on glioblastoma pathogenesis. *Oncotarget*. 2016; 7(18):24899–907. <https://doi.org/10.18632/oncotarget.8551> PMID: 27056901
  53. Carro MS, Lim WK, Alvarez MJ, Bollo RJ, Zhao X, Snyder EY, et al. The transcriptional network for mesenchymal transformation of brain tumours. *Nature*. 2010; 463(7279):318–25. Epub 2009/12/25. <https://doi.org/10.1038/nature08712> PMID: 20032975; PubMed Central PMCID: PMC4011561.
  54. Cooper LA, Gutman DA, Chisolm C, Appin C, Kong J, Rong Y, et al. The tumor microenvironment strongly impacts master transcriptional regulators and gene expression class of glioblastoma. *The American Journal of Pathology*. 2012; 180(5):2108–19. Epub 2012/03/24. <https://doi.org/10.1016/j.ajpath.2012.01.040> PMID: 22440258; PubMed Central PMCID: PMC3354586.
  55. Louis DN, Ohgaki H, Wiestler OD, Cavenee WK, Burger PC, Jouvet A, et al. The 2007 WHO classification of tumours of the central nervous system. *Acta Neuropathologica*. 2007; 114(2):97–109. Epub 2007/07/10. <https://doi.org/10.1007/s00401-007-0243-4> PMID: 17618441; PubMed Central PMCID: PMC1929165.
  56. Louis DN, Perry A, Reifenberger G, von Deimling A, Figarella-Branger D, Cavenee WK, et al. The 2016 World Health Organization Classification of Tumors of the Central Nervous System: a summary. *Acta Neuropathologica*. 2016; 131(6):803–20. Epub 2016/05/10. <https://doi.org/10.1007/s00401-016-1545-1> PMID: 27157931.
